# Supplementary material for: ROS Signaling Mediates Directional Cell Elongation and Somatic Cell Fusion in the Red Alga Griffithsia monilis
Source: MDPI journal article supplement (doi:10.3390/cells11132124), 2022-07-05
Supplement: s1 [file s1]

Supplementary Figure S1

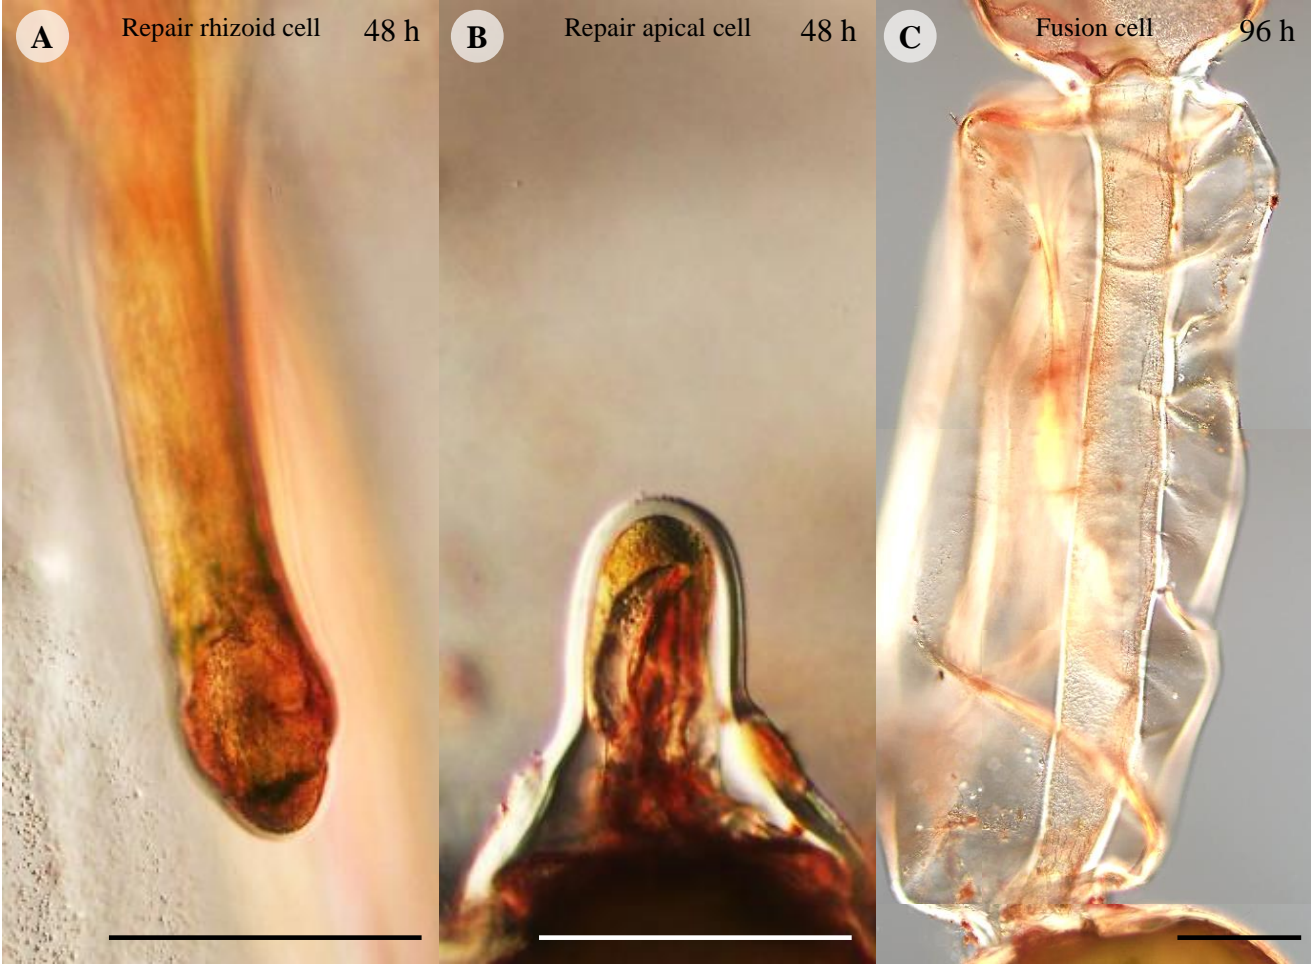

Supplementary Figure S2

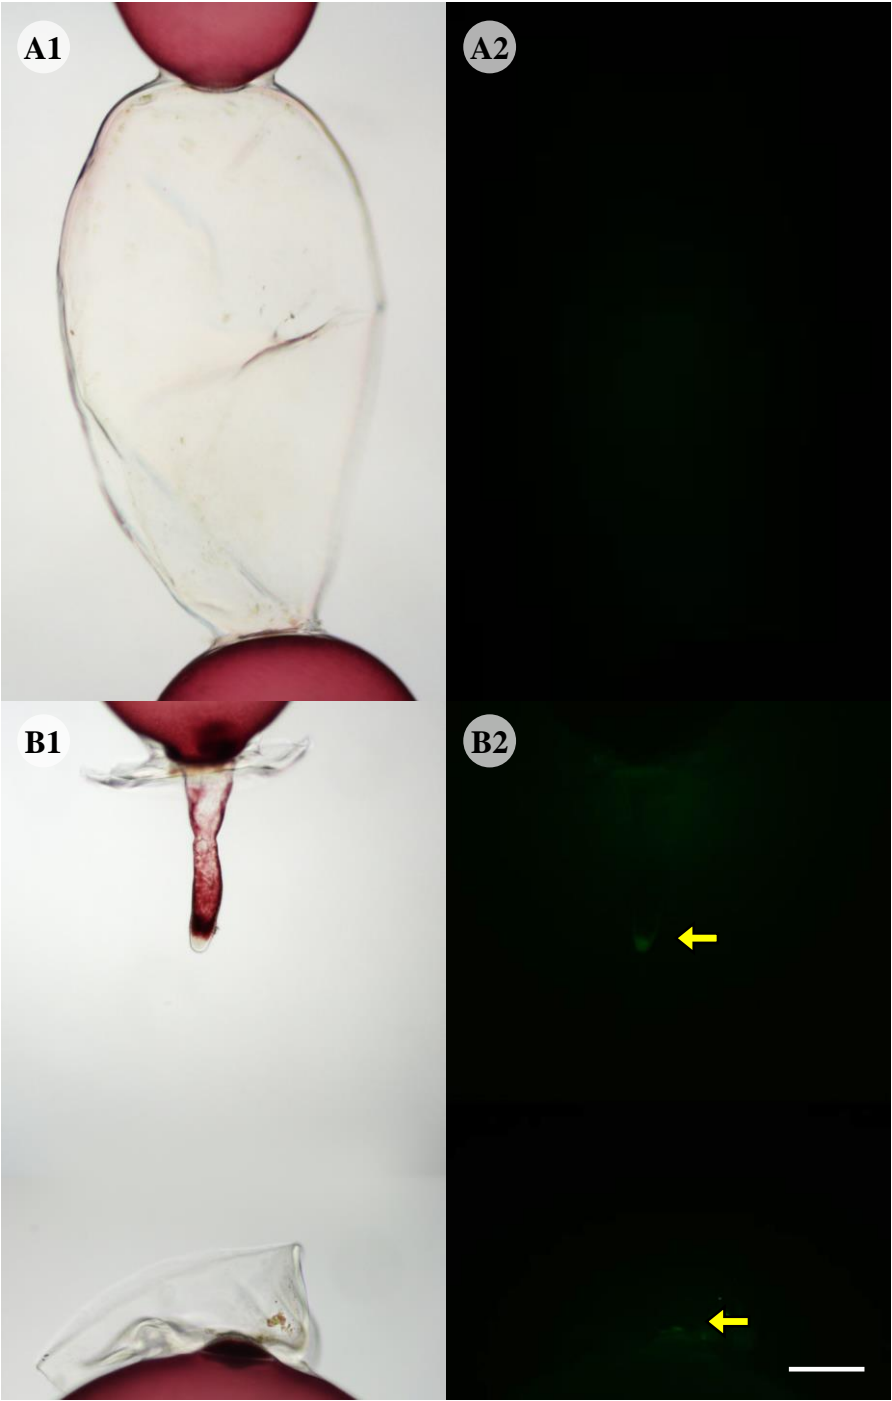

*GmRBOH1*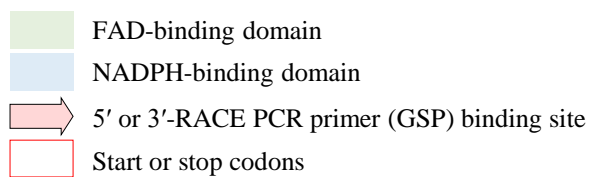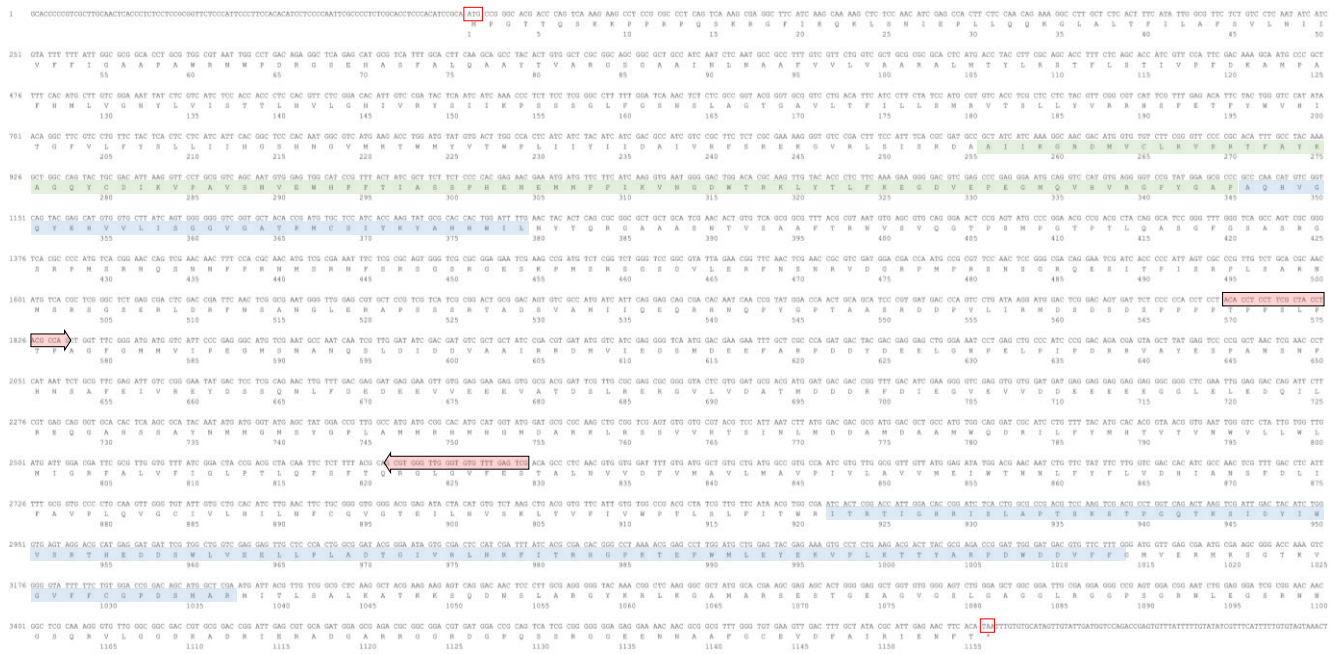 $GmRBOH2$ 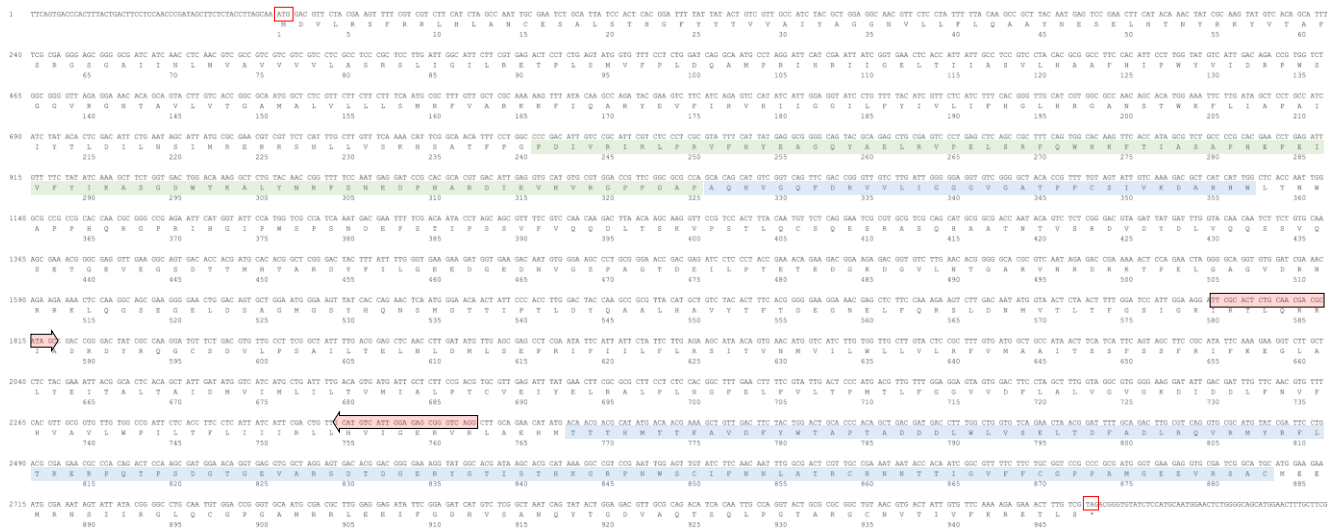



Supplementary Figure S3

B

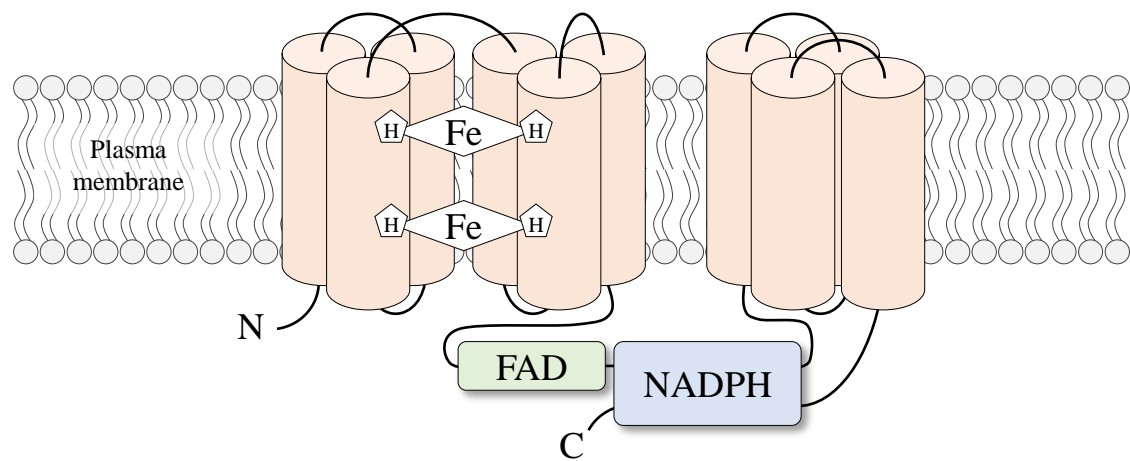

EF, EF hand; FAD, FAD-binding domain; H, Heme motif; NADPH, NADPH-binding domain; TM, transmembrane domain

Supplementary Figure S4

Ascorbic acid

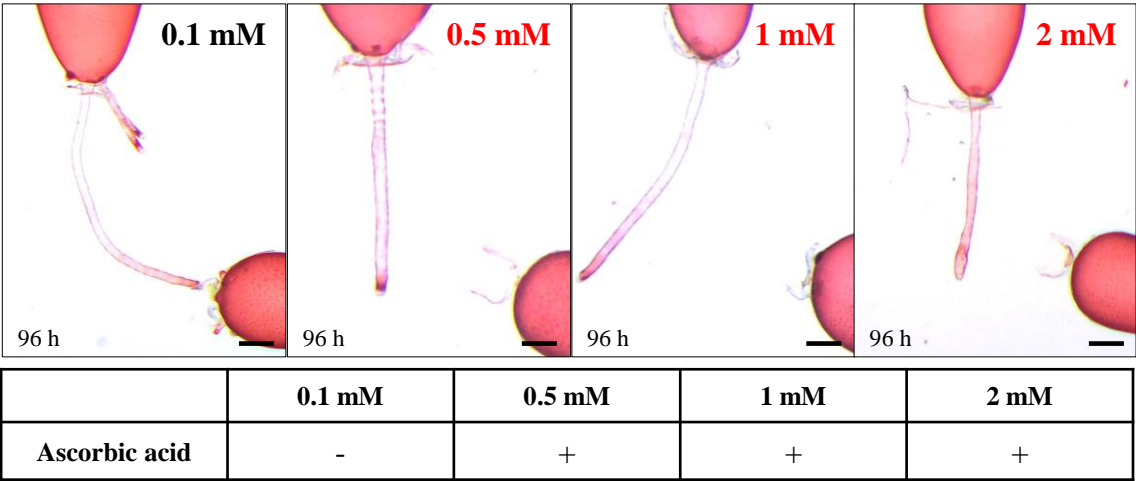

DPI

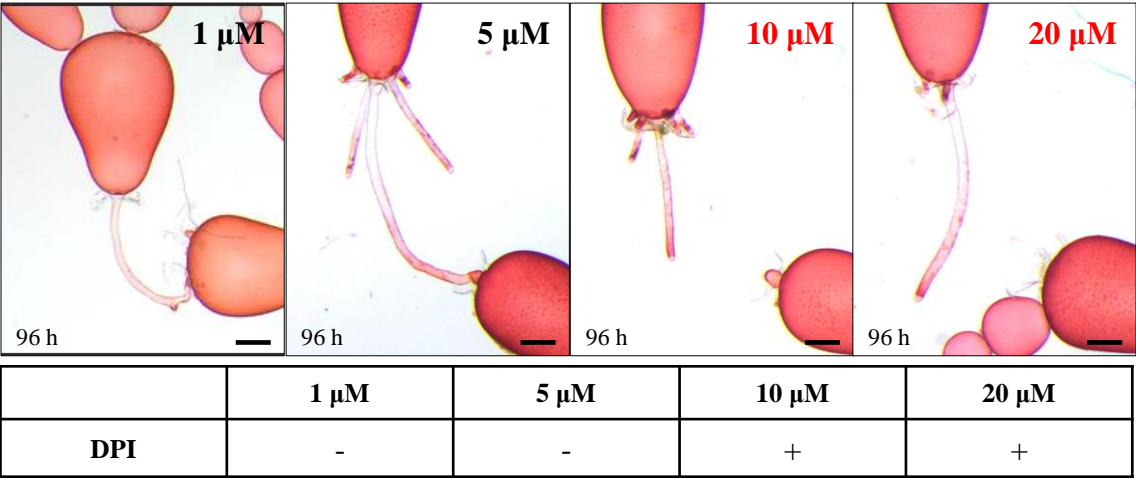

Caffeine

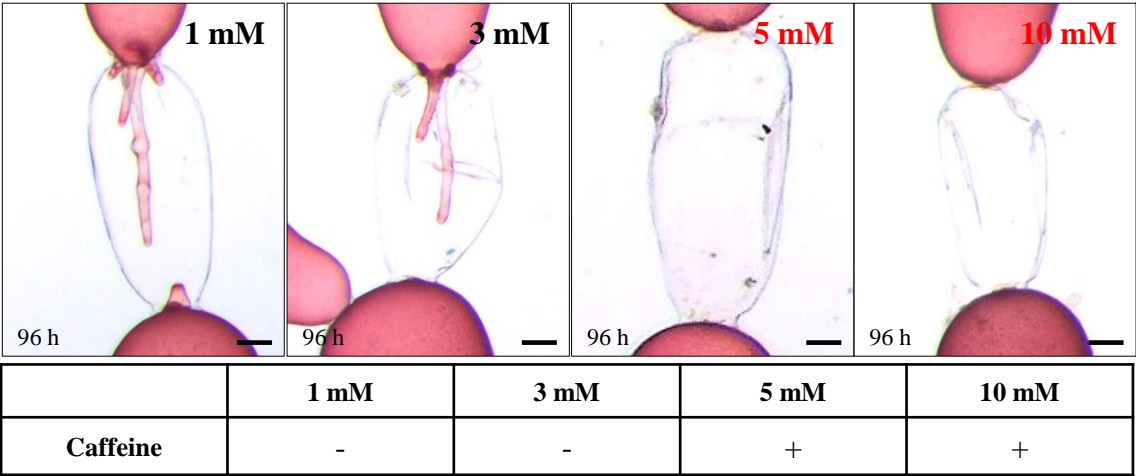

H<sub>2</sub>O<sub>2</sub>

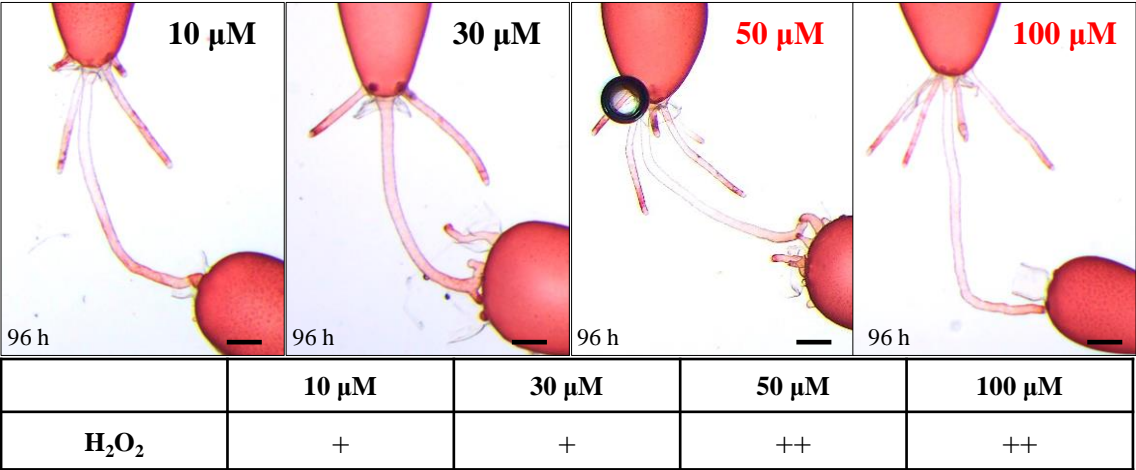



Supplementary Table S1

| Name                | Sense primer                                 | Antisense primer                             |
|---------------------|----------------------------------------------|----------------------------------------------|
| GmRBOH1-5'-RACE-GSP |                                              | GATTACGCCAAGCTTCGACTCA<br>AACACACCCAACCCACGC |
| GmRBOH1-3'-RACE-GSP | GATTACGCCAAGCTTACACCTC<br>CTTCGCTACCTACGCCAG |                                              |
| GmRBOH2-5'-RACE-GSP |                                              | GATTACGCCAAGCTTCCTGACC<br>CGCTCTCCAATGACATGC |
| GmRBOH2-3'-RACE-GSP | GATTACGCCAAGCTTTTCGCAC<br>TCTGCAACGACGCATAGC |                                              |
| GmRBOH3-5'-RACE-GSP |                                              | GATTACGCCAAGCTTCGGAGGT<br>GGAACTCGTGATGCAACG |
| GmRBOH3-3'-RACE-GSP | GATTACGCCAAGCTTCATCGCA<br>GGCGCTGTCTTCTTCCAC |                                              |
| GmRBOH4-5'-RACE-GSP |                                              | GATTACGCCAAGCTTGCACGGT<br>CCACACAAAGTCCACCTC |
| GmRBOH4-3'-RACE-GSP | GATTACGCCAAGCTTTCCTGCA<br>CGGCATGTTCAACTTCCG |                                              |
| GmEF1A-qPCR         | AGGTGGAGGATCCGGACTAC                         | CCCTCGCATTGCTTGAATCC                         |
| GmRBOH1-qPCR        | GATTGAGCGTGCAGATGGAG                         | GTCAACTTCACACCCAAACG                         |
| GmRBOH2-qPCR        | GAAATTACGGCACTCACAGC                         | GCGCGCGAAGTTCATAAATC                         |
| GmRBOH3-qPCR        | CAGATGGACGGGATTTGCG                          | GTGATAAGCCCCTGGAAGTC                         |
| GmRBOH4-qPCR        | GTTGTGGATGAGCGTGGAG                          | CACGGTCCACACAAAGTCC                          |
